# Supplementary material
Source: PubMed Central journal article supplement (PMC3537882)
Supplement: NIHMS420715-supplement-125_2012_2772_MOESM1_ESM.pdf [file NIHMS420715-supplement-125_2012_2772_MOESM1_ESM.pdf]

## Supplemental Figure Legend

Observed and basic-model-predicted estimates of cumulative incidence of cardiovascular disease among diabetic participants initially free of cardiovascular disease over 10 years in CHS (women panel A and men panel B) and 7 years in MESA (women panel C and men panel D) according to tertile of predicted risk calculated from the basic model. Individuals were categorized into sex-specific tertiles on the basis of predicted risk from the basic model. To generate predicted curves, we categorized individuals into tertiles on the basis of predicted risk from the basic model, computed the average value of covariates within tertile, and used those values along with the original regression coefficients and baseline hazard function from the basic model. Observed risk within tertiles was calculated using the Kaplan-Meier method.

Panel A

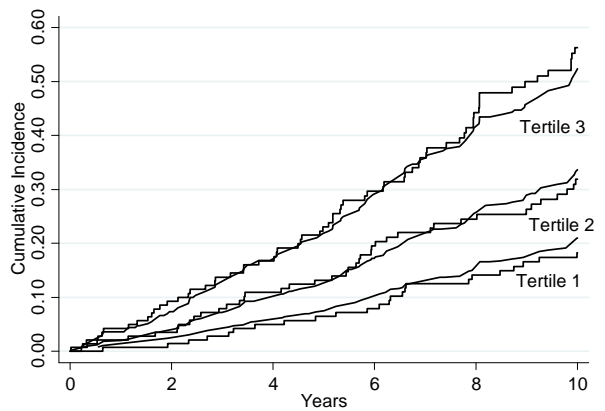

| Number at risk |     |     |     |     |     |    |
|----------------|-----|-----|-----|-----|-----|----|
| Tertile 1      | 142 | 139 | 132 | 122 | 107 | 97 |
| Tertile 2      | 142 | 134 | 118 | 99  | 86  | 72 |
| Tertile 3      | 142 | 124 | 106 | 81  | 60  | 41 |

Panel B

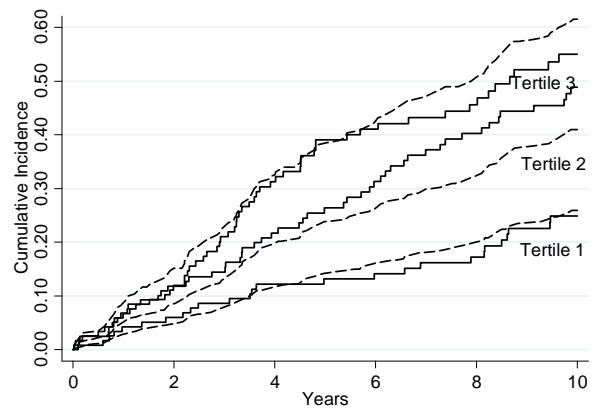

| Number at risk |     |     |    |    |    |    |
|----------------|-----|-----|----|----|----|----|
| Tertile 1      | 119 | 108 | 97 | 87 | 80 | 61 |
| Tertile 2      | 119 | 101 | 85 | 70 | 58 | 45 |
| Tertile 3      | 118 | 100 | 73 | 56 | 44 | 28 |

Panel C

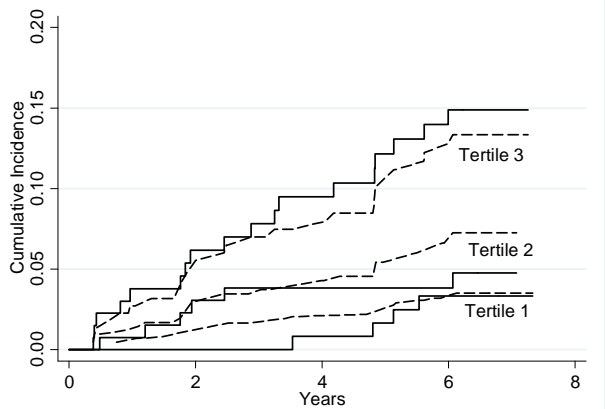

| Number at risk |     |     |     |     |   |
|----------------|-----|-----|-----|-----|---|
| Tertile 1      | 133 | 129 | 120 | 108 | 0 |
| Tertile 2      | 133 | 125 | 118 | 106 | 0 |
| Tertile 3      | 133 | 117 | 106 | 93  | 0 |

Panel D

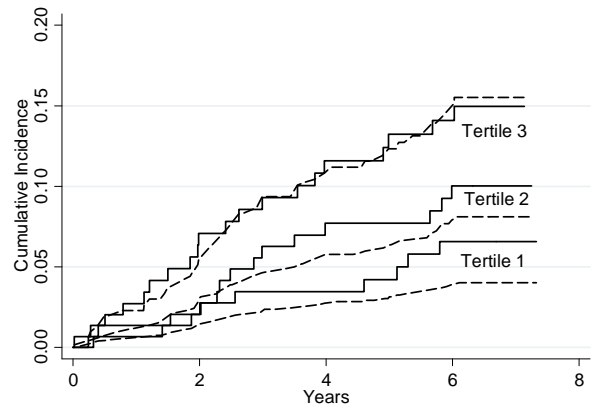

| Number at risk |     |     |     |     |   |
|----------------|-----|-----|-----|-----|---|
| Tertile 1      | 148 | 140 | 132 | 117 | 0 |
| Tertile 2      | 148 | 140 | 128 | 115 | 0 |
| Tertile 3      | 148 | 127 | 115 | 99  | 0 |
